## Correction

# Correction: A Tale of Two Reductases: Extending the Bacteriochlorophyll Biosynthetic Pathway in *E. coli*

The PLOS ONE Staff

### Notice of Republication

This article was republished on March 11, 2014, due to incorrect figure order. Please download this article again to view the correct version. The originally published, uncorrected article and the republished, corrected article are provided here for reference.

### Supporting Information

#### File S1.

Originally published, uncorrected article.

#### File S2.

Republished, corrected article.

### Reference

1. Tikh IB, Quin MB, Schmidt-Dannert C (2014) A Tale of Two Reductases: Extending the Bacteriochlorophyll Biosynthetic Pathway in *E. coli*. PLoS ONE 9(2): e89734. doi:10.1371/journal.pone.0089734

**Citation:** The PLOS ONE Staff (2014) Correction: A Tale of Two Reductases: Extending the Bacteriochlorophyll Biosynthetic Pathway in *E. coli*. PLoS ONE 9(3): e93807. doi:10.1371/journal.pone.0093807

**Published:** March 25, 2014

**Copyright:** © 2014 The PLOS ONE Staff. This is an open-access article distributed under the terms of the Creative Commons Attribution License, which permits unrestricted use, distribution, and reproduction in any medium, provided the original author and source are credited.
